# Supplementary material for: Host–guest chemistry of a chiral Schiff base copper(ii) complex: can chiral information be transferred to the guest cation?
Source: Royal Society of Chemistry journal article supplement (doi:10.1039/b922929a), 2010-01-01
Supplement: b922929a.pdf [file b922929a.pdf]

## Supplementary material

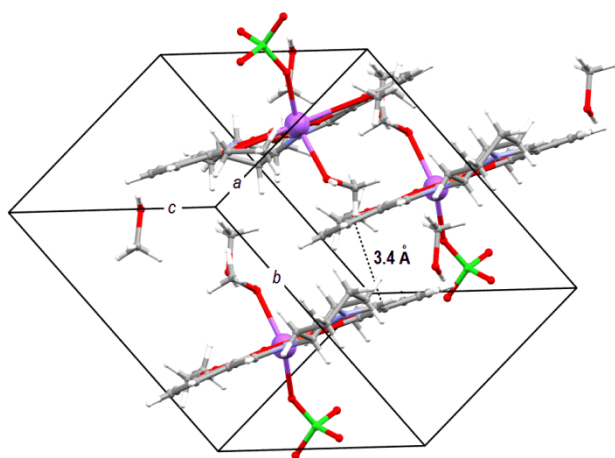

Fig. S1 Assembly of  $[\text{Cu}\{(R,R)\text{-1}\}\text{Na}(\text{CH}_3\text{OH})(\text{OCIO}_3)]$  molecules in  $[\text{Cu}\{(R,R)\text{-1}\}\text{Na}(\text{CH}_3\text{OH})(\text{OCIO}_3)]\cdot\text{CH}_3\text{OH}$  illustrating  $\pi$ -stacking between arene rings.
